# Supplementary material
Source: publisher figshare collection journal article supplement (https://acs.figshare.com/ndownloader/files/23614840)
Supplement: Supplementary file 1 [file 23614840]

Archive with 3 entries (3 files):
- info.xml
- jz0c01072_high_quality.mp4
- jz0c01072.pdf
