# Supplementary material
Source: publisher figshare collection journal article supplement (https://acs.figshare.com/ndownloader/files/23614840)
Supplement: Supplementary file 1 [file 23614840 › info.xml]

<presentation>
	<article>
		<title>Finite Temperature TD-DMRG for the Carrier Mobility of Organic Semiconductors</title>
		<doi>10.1021/acs.jpclett.0c01072</doi>
		<copyright>American Chemical Society</copyright>
		<narrator>Weitang Li</narrator>
		<contact>Weitang Li</contact>
		<contact-email>lwt17@mails.tsinghua.edu.cn</contact-email>
		<author-list>
			<author>Zhigang Shuai</author>
		</author-list>
	</article>
	<slides height-width-ratio=".75">
		<slide audio-time="23">
			<subtitle/>
		</slide>
		<slide audio-time="98">
			<subtitle/>
		</slide>
		<slide audio-time="15">
			<subtitle/>
		</slide>
		<slide audio-time="46">
			<subtitle/>
		</slide>
		<slide audio-time="40">
			<subtitle/>
		</slide>
		<slide audio-time="134">
			<subtitle/>
		</slide>
		<slide audio-time="78">
			<subtitle/>
		</slide>
		<slide audio-time="52">
			<subtitle/>
		</slide>
	</slides>
	<audio duration="486"/>
</presentation>
